# Supplementary material
Source: PubMed Central journal article supplement (PMC6872221)
Supplement: JCOPDF-6-210-s001.pdf [file JCOPDF-6-210-s001.pdf]

**Figure e1. Generic COPD Medications**

| Home Medications                              |   |
|-----------------------------------------------|---|
| <b>Beta 2 Agonists - Short Acting (SABA)</b>  |   |
| Albuterol                                     | ▼ |
| Levalbuterol                                  | ▼ |
| <b>Beta 2 Agonists - Long Acting (LABA)</b>   |   |
| Salmeterol                                    | ▼ |
| Arformoterol                                  | ▼ |
| Formeterol Fumarate                           | ▼ |
| Indacaterol Maleate                           | ▼ |
| Olodaterol                                    | ▼ |
| <b>Anticholinergics - Short-Acting (SAMA)</b> |   |
| Ipratropium Bromide                           | ▼ |

**Figure e2. Trade Name COPD Medications**

| Home Trade Name Medications                  |   |
|----------------------------------------------|---|
| <b>Beta 2 Agonists - Short Acting (SABA)</b> |   |
| Albuterol                                    | ▼ |
| Proair                                       | ▼ |
| Proventil                                    | ▼ |
| Ventolin                                     | ▼ |
| Xopenex                                      | ▼ |
| <b>Beta 2 Agonists - Long Acting (LABA)</b>  |   |
| Serevent                                     | ▼ |
| Brovana                                      | ▼ |
| Perforomist                                  | ▼ |
| Arcapta Neohaler                             | ▼ |

**Figure e3. Exacerbations Screen**

**Exacerbations**

Please answer the following questions:

Two or more exacerbations a year?

No Yes

---

One or more COPD hospitalizations?

No Yes

RESET **TOTAL SCORE** 0 NEXT

**Figure e4. Spirometry Results Screen**

**Spirometry Results**

Enter FVC %predicted:

Enter FEV<sub>1</sub> %predicted:

Enter FEV<sub>1</sub> / FVC Ratio, actual:

If spirometry is not available, click here for possible therapy options.

RESET NEXT

Figure e5. Secondary Menu – Calculators and Resources



The screenshot shows a mobile application interface for the COPD Foundation's 'COPD POCKET CONSULTANT GUIDE'. The menu is divided into two main sections: 'CALCULATORS' and 'RESOURCES'. The 'CALCULATORS' section includes: GW, mMRC, BODE, Exacerbation Score, Anxiety Scale, Depression Screener, Residual Volume, and Pulmonary Referral Checklist. The 'RESOURCES' section includes: Model, Flowcharts, and Special Considerations.

Additions include:

- PHQ (depression) and GAD (anxiety) screeners
- Links to inhaler instructional videos
- Residual volume calculation
- Pulmonary referral checklist
- BODE index
- DECAF exacerbation score

Figure e6. Secondary Menu -- PRAXIS Resources



The screenshot shows the same mobile application interface, but with the 'PRAXIS' section highlighted by an orange oval. The 'PRAXIS' section includes: PRAXIS Nexus, Resource Repository, and COPD Foundation Journal. The other menu items from the previous screenshot are still visible above the highlighted section.

PRAXIS additions:

- PRAXIS is the COPD Foundation's online hub for healthcare providers
- RSS feeds for:
  - PRAXIS Nexus blog: best practices, interviews, process highlights
  - Resource Repository: evidence-based toolkits, presentations, articles
  - JCOPDF: the Foundation's peer-reviewed scientific journal
